# Supplementary material for: The interaction between wheat roots and soil pores in structured field soil
Source: PubMed Central journal article supplement (PMC7853603; doi:10.1093/jxb/eraa475), 2020-10-16
Supplement: eraa475_suppl_supplementary_figures_s1-s3.pdf [file eraa475_suppl_supplementary_figures_s1-s3.pdf]

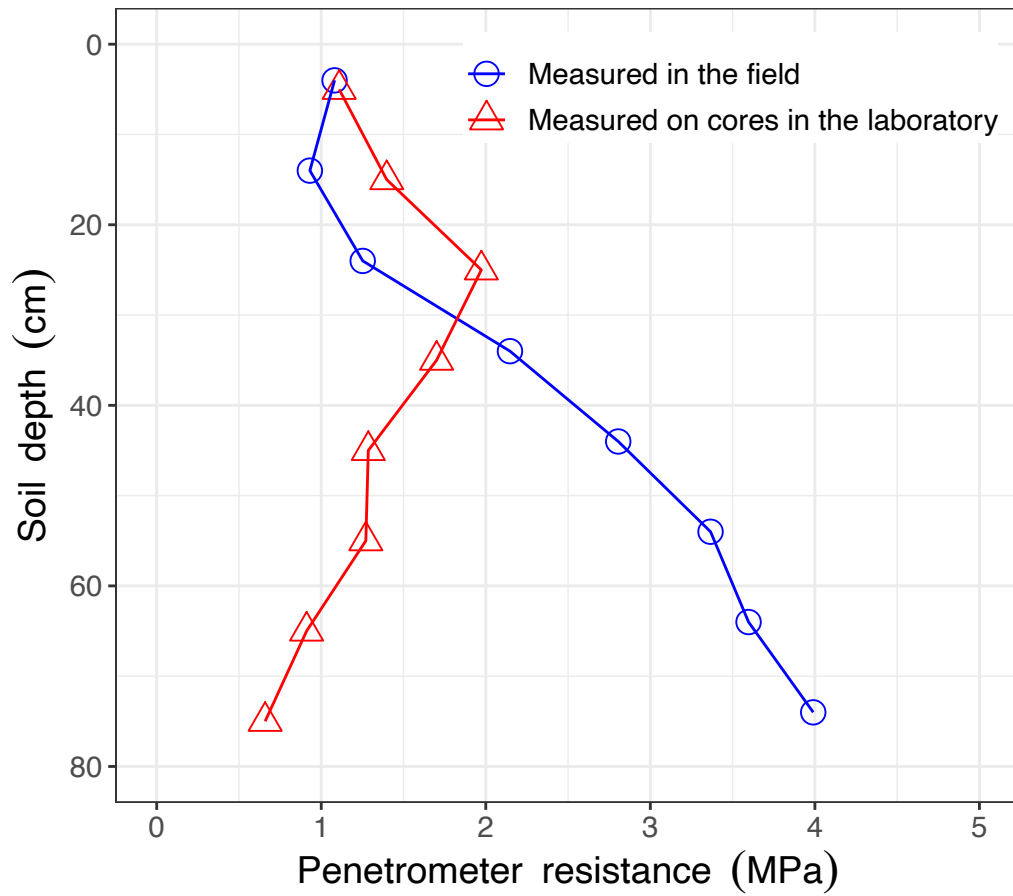

Figure S1. A comparison of penrometer resistance measured in the field with penrometer resistance measured in the laboratory on cores taken in the field

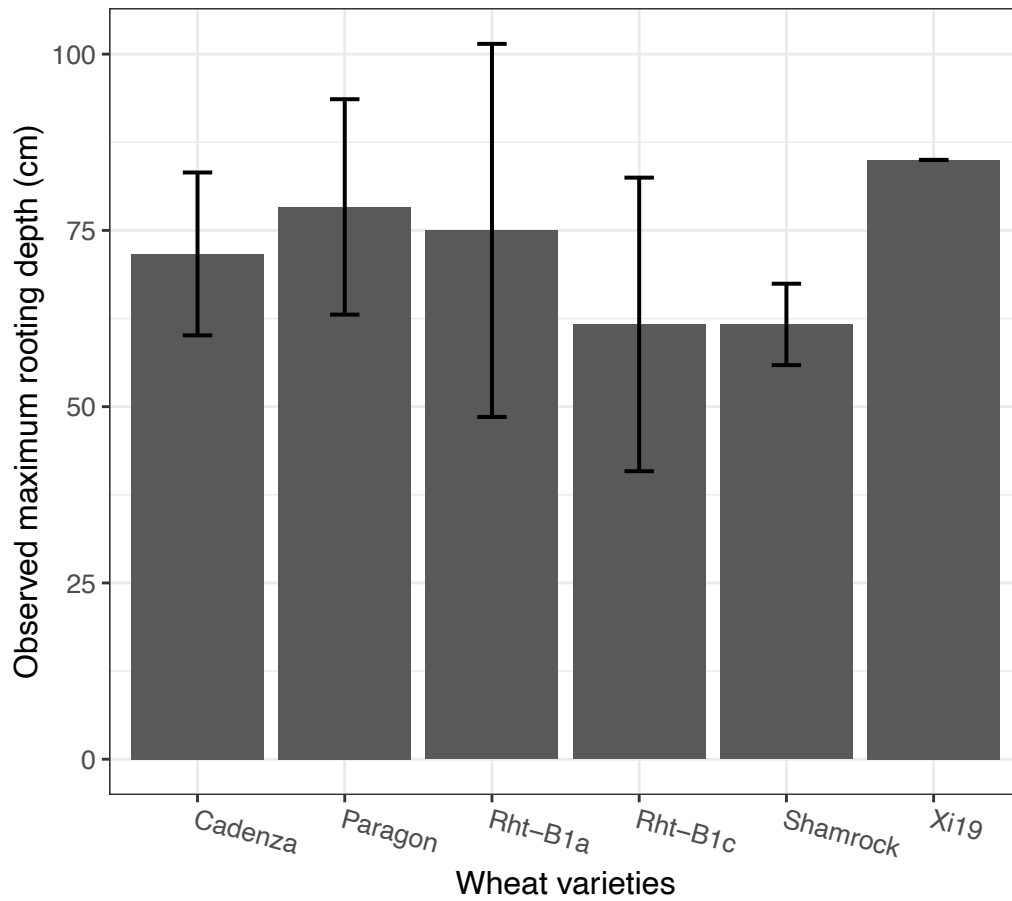

Figure S2. Observed maximum rooting depth of different wheat lines. Error bar indicate standard deviation.

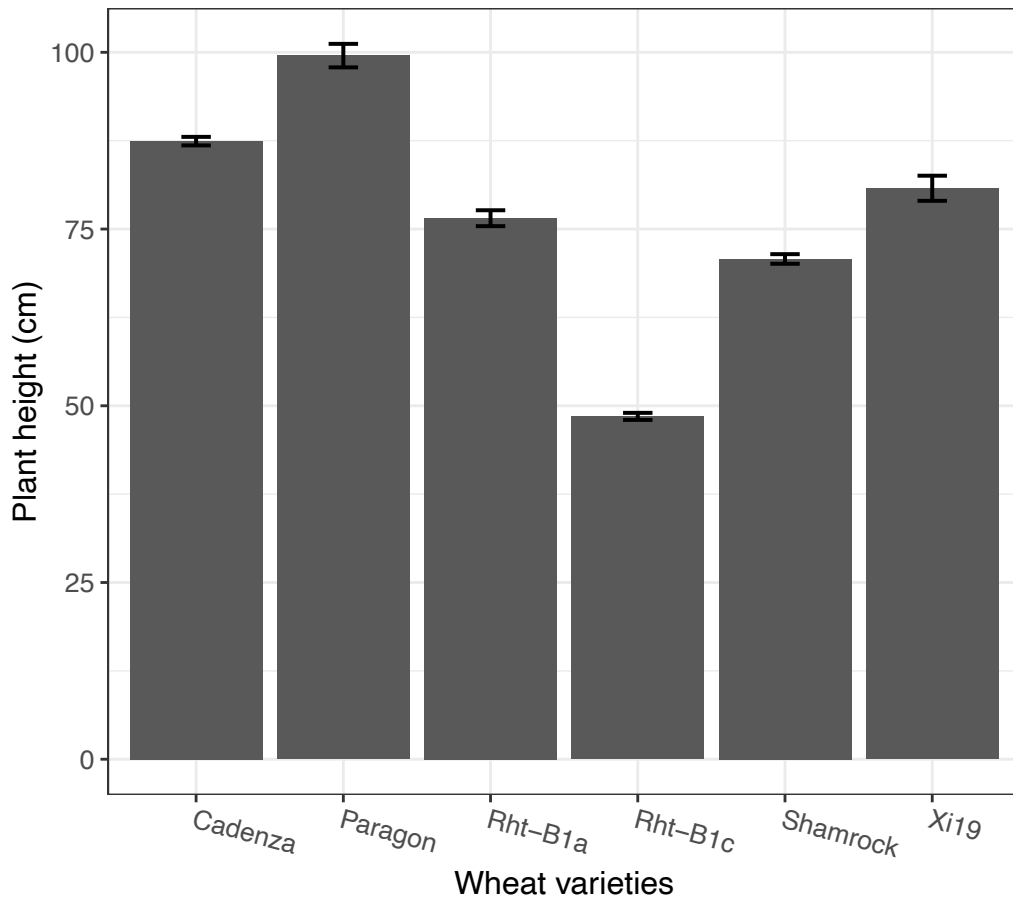

Figure S3. Plant height of different wheat lines. Error bar indicate standard deviation.
